# Supplementary material
Source: publisher figshare collection journal article supplement (https://tandf.figshare.com/ndownloader/files/27994178)
Supplement: Supplementary file 1 [file 27994178]

## Sheet: Table S1
Table S1. Individuals reaching cut-off score for moderate to severe childhood trauma exposure.
	Low trauma cluster (n=299)	Emotion-focused trauma cluster (n=71)	Multi-trauma cluster (n=43)
Childhood trauma (CTQ)
Physical abuse (10ª)	0.0769	0.0986	0.9302
Sexual abuse (8ª)	0.1605	0.4789	0.8605
Emotional abuse (13ª)	0.0234	0.7042	0.907
Physical neglect (10ª)	0.0803	0.4366	0.7674
Emotional neglect (15ª)	0.0803	0.7324	0.7381
ª cut-off score of respective childhood trauma type (Bernstein et al., 2003); CTQ=Childhood trauma questionnaire
